# Supplementary material for: A New Single Nucleotide Polymorphism Database for North American Atlantic Salmon Generated Through Whole Genome Resequencing
Source: Front Genet. 2020 Feb 21;11:85. doi: 10.3389/fgene.2020.00085 (PMC7046687; doi:10.3389/fgene.2020.00085)
Supplement: Supplementary file 4 [file Table_2.xlsx]

## Sheet: Batch1-2_NCWMAC_stat
Supplementary File S2. Information on each of the 80 NA Atlantic salmon samples sequenced in this study, including population affiliation, number of sequence-reads and genome sequence coverage.
Sample	raw total sequences	1st fragments	last fragments	reads mapped	mapping percentage	reads mapped and paired	mapped paired percentage	Coverage	reads unmapped	reads properly paired	Coverage	reads paired	reads MQ0	total length	bases mapped	bases mapped (cigar)	Coverage	mismatches	error rate	average length	maximum length	average quality	insert size average	insert size standard deviation	inward oriented pairs	outward oriented pairs	pairs with other orientation	pairs on different chromosomes
SJR_YC13-14_Fam1	432205964	216102982	216102982	430700835	0.996518	429754566	0.994328	21.3445	1505129	403085140	20.0199	432205964	83614038	64726933020	64501359414	62203320537	20.7344	736605942	0.0118419	149	150	35	354.5	114.7	196720561	5519020	287007	11354234
SJR_YC13-14_Fam2	375261362	187630681	187630681	373968917	0.996556	373171202	0.99443	18.5342	1292445	348961418	17.3318	375261362	73794223	56184768229	55991074515	54025993379	18.0087	644761691	0.0119343	149	150	35.1	345.7	114.1	169844553	5013263	250085	10352832
SJR_YC13-14_Fam3	380952702	190476351	190476351	379418486	0.995973	378388356	0.993269	18.7933	1534216	354973402	17.6303	380952702	75723466	57052611977	56822671340	54833487805	18.2778	657401875	0.0119891	149	150	35	343.2	113.6	173086645	4888167	241997	10004923
SJR_YC13-14_Fam4	402887044	201443522	201443522	401478173	0.996503	400554396	0.99421	19.8942	1408871	375961416	18.6728	402887044	81689893	60333515979	60122370061	58095502019	19.3652	687983542	0.0118423	149	150	35.1	339.7	113	183304063	5238810	248791	10431713
SJR_YC13-14_Fam5	363175526	181587763	181587763	361776882	0.996149	360822180	0.99352	17.9208	1398644	337887344	16.7817	363175526	72831806	54388374843	54178758547	52264147556	17.4214	616647732	0.0117987	149	150	35	345.3	113.9	164827344	4615426	234633	9799161
SJR_YC13-14_Fam6	327733984	163866992	163866992	326508254	0.99626	325696244	0.993782	16.1762	1225730	305327446	15.1646	327733984	62987873	49081980517	48898274088	47224681485	15.7416	566381315	0.0119933	149	150	35	341.1	113.8	148868606	4246810	215275	8671601
SJR_YC13-14_Fam7	338080830	169040415	169040415	336956307	0.996674	336246158	0.994573	16.7002	1124523	315849002	15.6872	338080830	65911346	50631988947	50463463521	48829777929	16.2766	562242856	0.0115143	149	150	35.2	343	113.9	154150480	4294701	207938	8628316
SJR_YC13-14_Fam8	280069210	140034605	140034605	279071666	0.996438	278426612	0.994135	13.8285	997544	261551712	12.9904	280069210	55186479	41941986060	41792481509	40355263961	13.4518	476108454	0.0117979	149	150	35	342.1	115.3	127503556	3612226	174542	7156112
SJR_YC13-14_Fam9	354215138	177107569	177107569	352825631	0.996077	351899174	0.993462	17.4777	1389507	329823160	16.3812	354215138	69273380	53046320501	52838066052	50972101681	16.9907	612112475	0.0120088	149	150	35	341.2	112.4	160726283	4541719	233436	9501460
SJR_YC13-14_Fam10	379594870	189797435	189797435	378297839	0.996583	377444280	0.994335	18.7464	1297031	354204762	17.5922	379594870	73650061	56850599339	56656216840	54749634177	18.2499	640947360	0.0117069	149	150	35.1	342.3	114.3	172641327	4905698	245375	9993361
SJR_YC13-14_Fam11	323686534	161843267	161843267	322595661	0.99663	321916470	0.994532	15.9885	1090873	302284408	15.0135	323686534	65638174	48472479102	48308995258	46737143597	15.579	539551584	0.0115444	149	150	35.2	334.7	111.6	147228218	4203095	201463	8426270
SJR_YC13-14_Fam12	307328324	153664162	153664162	306288351	0.996616	305619196	0.994439	15.1791	1039973	287561048	14.2822	307328324	59257632	46028396082	45872537829	44364278814	14.7881	516562590	0.0116437	149	150	35.1	339.7	112.5	140280102	3950775	187542	7669943
SJR_YC13-14_Fam13	411334940	205667470	205667470	409935070	0.996597	409036940	0.994413	20.3155	1399870	384301392	19.087	411334940	82055950	61596484198	61386689442	59359499919	19.7865	689390116	0.0116138	149	150	35.1	333	110.2	187115488	5366873	258589	10585789
SJR_YC13-14_Fam14	297582676	148791338	148791338	296329712	0.99579	295627212	0.993429	14.6828	1252964	277525888	13.7838	297582676	58783413	44552029859	44364251659	42903096512	14.301	504485892	0.0117587	149	150	35.1	331.7	110	134885681	3935755	186059	7756908
SJR_YC14-15_Fam1	380226380	190113190	190113190	378722399	0.996045	377763834	0.993523	18.7623	1503981	354291890	17.5965	380226380	73547129	56943887832	56718479408	54852753025	18.2843	659999748	0.0120322	149	150	35	337.3	109.6	172747442	4871837	241786	10053167
SJR_YC14-15_Fam2	419940800	209970400	209970400	418416457	0.99637	417502022	0.994193	20.7359	1524343	392092744	19.4739	419940800	81712461	62889605348	62661151524	60530035942	20.1767	706939977	0.0116792	149	150	35.1	342.9	113.6	191105600	5380921	258454	10897129
SJR_YC14-15_Fam3	421052052	210526026	210526026	418938280	0.99498	417387614	0.991297	20.7303	2113772	391909798	19.4649	421052052	83056658	63057082160	62740251543	60471451627	20.1572	813238800	0.0134483	149	150	34.6	331.2	109.1	190763074	5370487	269059	11016686
SJR_YC14-15_Fam4	356549974	178274987	178274987	355025579	0.995725	354149696	0.993268	17.5894	1524395	333130750	16.5455	356549974	70040582	53399250229	53170775595	51419132788	17.1397	608096004	0.0118263	149	150	35.1	338.1	112.7	162308368	4624140	218400	9008475
SJR_YC14-15_Fam5	277180912	138590456	138590456	276110945	0.99614	275392516	0.993548	13.6778	1069967	258890818	12.8582	277180912	54920459	41508248394	41347882955	39974369773	13.3248	470338394	0.011766	149	150	35.1	335	110.5	126017803	3553681	174856	7087574
SJR_YC14-15_Fam6	318566174	159283087	159283087	317322658	0.996097	316564188	0.993716	15.7227	1243516	296864276	14.7443	318566174	62473545	47697560635	47511191189	45926794616	15.3089	544845694	0.0118633	149	150	35.1	330.9	110.1	144315722	4185578	200237	8466834
SJR_YC14-15_Fam7	374423922	187211961	187211961	372640553	0.995237	371591542	0.992435	18.4557	1783369	347777914	17.273	374423922	74820736	56071914201	55804624489	53896794968	17.9656	653115888	0.0121179	149	150	35	339.2	111.9	169371155	4893142	242087	10245689
SJR_YC14-15_Fam8	381891310	190945655	190945655	380319946	0.995885	379281088	0.993165	18.8376	1571364	355026990	17.633	381891310	73189743	57191662519	56956149849	54998263665	18.3328	659929053	0.0119991	149	150	35	340.9	113	173009548	4926805	250349	10480463
SJR_YC14-15_Fam9	347476634	173738317	173738317	346213974	0.996366	345408392	0.994048	17.1553	1262660	323501220	16.0672	347476634	68292154	52037317503	51848082532	50189923550	16.73	587532527	0.0117062	149	150	35.1	341.8	112.4	157764850	4401965	227458	9432450
SJR_YC14-15_Fam10	379665640	189832820	189832820	378306041	0.996419	377473862	0.994227	18.7479	1359599	354114000	17.5877	379665640	73643546	56857904817	56654143548	54752363124	18.2508	653442996	0.0119345	149	150	35.1	339.7	112.7	172479493	4979010	239727	10041870
SJR_YC14-15_Fam11	355542842	177771421	177771421	354157827	0.996105	353251560	0.993556	17.5448	1385015	330091064	16.3945	355542842	71832534	53245195041	53037613119	51206265093	17.0688	612780258	0.0119669	149	150	35	338.1	111.2	160918752	4577999	237082	9999823
SJR_YC14-15_Fam12	343311582	171655791	171655791	342157253	0.996638	341403606	0.994442	16.9564	1154329	320089710	15.8978	343311582	66002916	51420126863	51247122316	49612981314	16.5377	572961183	0.0115486	149	150	35.2	341.5	111.3	156277229	4338087	220354	9158410
SJR_YC14-15_Fam13	389887190	194943595	194943595	388147813	0.995539	387133896	0.992938	19.2277	1739377	361289358	17.944	389887190	76022470	58380939040	58120248310	56122401253	18.7075	670430945	0.0119459	149	150	35	347.6	115.1	176084413	4886515	279283	11187484
SJR_YC14-15_Fam14	345665276	172832638	172832638	344355574	0.996211	343476568	0.993668	17.0593	1309702	322166820	16.001	345665276	68084927	51770576861	51574283783	49844771225	16.6149	596989516	0.011977	149	150	35	344.4	115.2	157211358	4382299	222199	9098966
SJR_YC16-17_Fam1	368810118	184405059	184405059	367250342	0.995771	366252114	0.993064	18.1905	1559776	343284724	17.0498	368810118	71039961	55230165821	54996392405	53170448371	17.7235	628861858	0.0118273	149	150	35	344.9	113.7	167425906	4610104	240932	9883624
SJR_YC16-17_Fam2	424466094	212233047	212233047	422785352	0.99604	421620198	0.993295	20.9405	1680742	394408520	19.589	424466094	83446512	63568563114	63316657082	61158733322	20.3862	723148930	0.0118241	149	150	35.1	338.4	110.4	192257378	5455120	282554	11791123
SJR_YC16-17_Fam3	445066048	222533024	222533024	443181193	0.995765	441893242	0.992871	21.9474	1884855	412876842	20.5062	445066048	87997477	66651618203	66369123034	64170711671	21.3902	760455187	0.0118505	149	150	35	341.4	111.4	201317689	5633978	303326	12604888
SJR_YC16-17_Fam4	371573498	185786749	185786749	370122608	0.996095	369155266	0.993492	18.3347	1450890	344854784	17.1278	371573498	71237591	55639802433	55422348525	53590019373	17.8633	626177256	0.0116846	149	150	35.1	348.8	115.3	168086953	4725498	251105	10529036
SJR_YC16-17_Fam5	567889786	283944893	283944893	565678773	0.996107	564206990	0.993515	28.0223	2211013	527862642	26.2172	567889786	109593088	85048198265	84716814177	81908769860	27.3029	961256578	0.0117357	149	150	35.1	354.4	117.9	257525681	7125114	385173	15758627
SJR_YC16-17_Fam6	427642468	213821234	213821234	425855103	0.99582	424614738	0.99292	21.0892	1787365	397205962	19.7279	427642468	83647204	64047531075	63779640663	61670523322	20.5568	730556789	0.0118461	149	150	35	353	117	193920361	5282403	287638	11903014
SJR_YC16-17_Fam7	367947230	183973615	183973615	366393730	0.995778	365333472	0.992896	18.1449	1553500	341111056	16.9418	367947230	73351651	55104630112	54871794574	53019495363	17.6732	633585161	0.01195	149	150	35	350.7	115.9	166449228	4615271	255373	10534384
SJR_YC16-17_Fam8	424204832	212102416	212102416	422448057	0.995859	421272730	0.993088	20.9232	1756775	392957688	19.5169	424204832	82643477	63527357225	63264058018	61095473330	20.3652	714796020	0.0116997	149	150	35.1	351.1	117.5	191610089	5412831	292556	12339976
SJR_YC16-17_Fam9	337163996	168581998	168581998	335727638	0.99574	334663840	0.992585	16.6216	1436358	314385400	15.6145	337163996	64264691	50501494863	50286197863	48672623291	16.2242	647251118	0.0132981	149	150	34.7	344.4	112.7	153381678	4297320	210717	8743223
SJR_YC16-17_Fam10	387413270	193706635	193706635	385754203	0.995718	384632538	0.992822	19.1034	1659067	360177250	17.8888	387413270	74921045	58020908195	57772244940	55838755729	18.6129	669610298	0.0119919	149	150	35	346.5	114.8	175660472	4901180	266144	10587294
SJR_YC16-17_Fam11	369529356	184764678	184764678	367988827	0.995831	366953498	0.993029	18.2254	1540529	343142630	17.0428	369529356	71840100	55346388068	55115495894	53243177775	17.7477	625785843	0.0117533	149	150	35.1	350	114.9	167554768	4620194	254477	10325467
SJR_YC16-17_Fam12	549681880	274840940	274840940	547647635	0.996299	546320442	0.993885	27.1339	2034245	512404810	25.4494	549681880	106606269	82326973455	82022094640	79379622200	26.4599	933010820	0.0117538	149	150	35.1	342.7	112.5	249888312	7060000	358230	14642008
SJR_YC16-17_Fam13	524924786	262462393	262462393	523366435	0.997031	522433504	0.995254	25.9475	1558351	492501644	24.4609	524924786	101226163	78634614394	78401049775	76441775201	25.4806	878233079	0.0114889	149	150	35.4	333.8	111.3	240289033	7083294	303210	12520362
PR_YC13-14_Fam1	397681458	198840729	198840729	396445359	0.996892	395722668	0.995074	19.6542	1236099	372102492	18.4811	397681458	76359490	59567621467	59382356193	57860623066	19.2869	681859021	0.0117845	149	150	35.4	333.3	110.3	181352349	5509226	237536	9904199
PR_YC13-14_Fam2	366302176	183151088	183151088	365202521	0.996998	364545302	0.995204	18.1057	1099655	344077380	17.0892	366302176	72132995	54866175133	54701360367	53389565087	17.7965	629904343	0.0117983	149	150	35.4	299.4	93.8	167690419	5032017	205202	8333304
PR_YC13-14_Fam3	381064624	190532312	190532312	379905953	0.996959	379206734	0.995124	18.8339	1158671	357074904	17.7347	381064624	73806544	57082502608	56908838494	55449191909	18.4831	660905381	0.0119191	149	150	35.4	329.6	111.1	173945963	5347454	226945	9309862
PR_YC13-14_Fam4	366803864	183401932	183401932	365690514	0.996965	365020320	0.995138	18.1293	1113350	343810018	17.0759	366803864	70065103	54926328838	54759471376	53313452441	17.7712	630791338	0.0118318	149	150	35.4	337.1	118	166965937	5173586	216866	8935548
PR_YC13-14_Fam5	416526312	208263156	208263156	415215156	0.996852	414423536	0.994952	20.583	1311156	390840682	19.4118	416526312	80256232	62395079502	62198559096	60631993672	20.2107	723278097	0.011929	149	150	35.4	317.4	103.7	190467554	5783864	240250	9817583
PR_YC12-13_Fam1	441403022	220701511	220701511	440129252	0.997114	439380606	0.995418	21.8226	1273770	413195688	20.5221	441403022	85638214	66093915991	65903016082	64254671139	21.4182	750757524	0.0116841	149	150	35.5	333.5	116.8	200558843	6290188	261309	11040819
PR_YC12-13_Fam2	464141794	232070897	232070897	462714673	0.996925	461846302	0.995054	22.9384	1427121	434298256	21.5701	464141794	89875251	69508117940	69294224352	67450584957	22.4835	810285641	0.012013	149	150	35.4	334.5	118.6	210788979	6673336	279995	11699605
PR_YC12-13_Fam3	455542686	227771343	227771343	453830694	0.996242	452755878	0.993882	22.4869	1711992	422205812	20.9696	455542686	86973794	68236944480	67980342833	65866366607	21.9555	818530033	0.0124271	149	150	35.1	397.7	143.7	206400949	6195062	300770	12655180
PR_YC12-13_Fam4	380739374	190369687	190369687	379580752	0.996957	378847004	0.99503	18.8161	1158622	354895172	17.6265	380739374	73714449	57024611746	56850961957	55294532900	18.4315	656199892	0.0118674	149	150	35.4	363	138.7	172890460	5405392	258345	9908045
PR_YC12-13_Fam5	394235548	197117774	197117774	392975112	0.996803	392213418	0.994871	19.4799	1260436	367003616	18.2278	394235548	76048081	59037480808	58848573932	57223449297	19.0745	685844275	0.0119854	149	150	35.3	369.2	140.4	178743094	5576836	253701	10425870
PR_YC12-13_Fam6	385289430	192644715	192644715	384049203	0.996781	383285518	0.994799	19.0365	1240227	359348636	17.8476	385289430	72130572	57717770380	57531885660	55921078570	18.6404	675608828	0.0120815	149	150	35.3	373.7	144.5	175392495	5386396	241251	9963341
GNB_YC12-13_Fam1	419332480	209666240	209666240	418021663	0.996874	417213376	0.994946	20.7216	1310817	392113656	19.475	419332480	79810140	62805843479	62609382250	60888832388	20.2963	702677308	0.0115403	149	150	35.3	367.8	140.8	191030101	5765499	246400	10521548
GNB_YC12-13_Fam2	420150280	210075140	210075140	418525904	0.996134	417657876	0.994068	20.7437	1624376	393757622	19.5566	420150280	79638678	62927614832	62684148263	61010186346	20.3367	699626056	0.0114674	149	150	35.3	350.5	132.8	191436269	5835839	243984	10088841
GNB_YC12-13_Fam3	416649064	208324532	208324532	415241885	0.996623	414368498	0.994526	20.5803	1407179	391309344	19.435	416649064	79343996	62407384345	62196472998	60604391565	20.2015	705222359	0.0116365	149	150	35.3	338.5	122.2	190390639	5745560	233421	9677946
GNB_YC12-13_Fam4	433197514	216598757	216598757	431742707	0.996642	430860614	0.994605	21.3994	1454807	404615806	20.0959	433197514	81332392	64894960782	64676908300	62909629997	20.9699	720384137	0.0114511	149	150	35.3	370.6	143.2	197793825	5800460	259816	10802238
GNB_YC12-13_Fam5	516070958	258035479	258035479	513807624	0.995614	512211254	0.992521	25.4398	2263334	481803552	23.9296	516070958	98221256	77309802089	76970536233	74741246624	24.9137	971523621	0.0129985	149	150	34.9	335.7	125.7	235022137	7074747	305981	12538858
GNB_YC12-13_Fam6	440549656	220274828	220274828	439124515	0.996765	438262494	0.994808	21.767	1425141	413240174	20.5243	440549656	83369048	65985955157	65772354821	64107920113	21.3693	736491490	0.0114883	149	150	35.3	341.4	130	201300460	6126826	250638	10283363
GNB_YC12-13_Fam7	285309448	142654724	142654724	284401572	0.996818	283844228	0.994864	14.0976	907876	266867138	13.2544	285309448	53614856	42734382989	42598310141	41484968225	13.8283	476144725	0.0114775	149	150	35.3	345	128.9	130280315	3903586	164859	6855444
GNB_YC12-13_Fam8	368950890	184475445	184475445	367744576	0.99673	367053406	0.994857	18.2303	1206314	345799438	17.1747	368950890	70798106	55259540067	55078735762	53681025110	17.8937	613123617	0.0114216	149	150	35.4	337.1	129.8	168504269	5168486	207367	8589480
GNB_YC12-13_Fam9	373584328	186792164	186792164	372444475	0.996949	371742096	0.995069	18.4632	1139853	351365772	17.4512	373584328	71507722	55944393103	55773555707	54406270112	18.1354	627614833	0.0115357	149	150	35.4	323.4	123.3	170639352	5313667	203051	8320053
GNB_YC12-13_Fam10	324365062	162182531	162182531	323305875	0.996735	322647394	0.994705	16.0248	1059187	304055356	15.1014	324365062	58645963	48585504586	48426749236	47161642544	15.7205	547582380	0.0116108	149	150	35.3	339.1	125.6	148125050	4500762	184780	7687269
GNB_YC12-13_Fam11	344635588	172317794	172317794	343505683	0.996721	342811768	0.994708	17.0263	1129905	322372002	16.0111	344635588	65556608	51627938891	51458584344	50116464265	16.7055	575187403	0.011477	149	150	35.3	359.4	134.1	157485447	4600642	201417	8481239
GNB_YC12-13_Fam12	440372088	220186044	220186044	439007006	0.9969	438206516	0.995082	21.7643	1365082	414141202	20.569	440372088	83725264	65954706349	65750110935	64111259531	21.3704	732367145	0.0114234	149	150	35.4	328.2	126.3	201146324	6296607	243617	9976032
GNB_YC_15-16_Fam1	308341454	154170727	154170727	307228158	0.996389	306508872	0.994057	15.3254	1113296	286618648	14.3309	308341454	64080544	46263529450	46095838634	44017842176	14.6726	540386643	0.0122765	150	151	34.9	333.3	142.4	133752190	4286056	209708	8857552
GNB_YC_15-16_Fam2	332583634	166291817	166291817	330812120	0.994673	330055698	0.992399	16.5028	1771514	308531684	15.4266	332583634	69365301	49911625973	49644749352	47412099720	15.804	590553208	0.0124557	150	151	35.3	332.3	143.7	143905488	4907549	225893	9561328
GNB_YC_15-16_Fam3	316105782	158052891	158052891	314844153	0.996009	314041544	0.99347	15.7021	1261629	292212494	14.6106	316105782	66504430	47431001752	47240954099	45098458423	15.0328	566708827	0.012566	150	151	34.9	337.6	145.1	136699756	4436698	223491	9620967
GNB_YC_15-16_Fam4	305175938	152587969	152587969	304109601	0.996506	303435042	0.994295	15.1718	1066337	283931520	14.1966	305175938	63171743	45821534676	45660914054	43658910031	14.553	531922322	0.0121836	150	151	35	330.7	142	133363638	4279128	202309	8581504
SJR_YC_15-16_Fam1	307748902	153874451	153874451	306572113	0.996176	305815780	0.993719	15.2908	1176789	286008706	14.3004	307748902	63084986	46175010426	45997806789	43886904051	14.629	556011834	0.0126692	150	151	35	325.7	136.1	133591801	4310443	213009	8736913
SJR_YC_15-16_Fam2	304827342	152413671	152413671	303581073	0.995912	302763094	0.993228	15.1382	1246269	281217236	14.0609	304827342	63746426	45822661257	45634876065	43488977300	14.4963	547879746	0.0125981	150	151	34.9	344.1	144	133705787	4133871	220309	9418815
SJR_YC_15-16_Fam3	295968574	147984287	147984287	294851290	0.996225	294116274	0.993742	14.7058	1117284	274414714	13.7207	295968574	62406192	44405068927	44236782334	42187447651	14.0625	530698697	0.0125795	150	151	34.9	324.5	140.7	128016212	4262234	203062	8623192
SJR_YC_15-16_Fam4	317791204	158895602	158895602	316453427	0.99579	315592866	0.993082	15.7796	1337777	291874138	14.5937	317791204	67883861	47759318028	47557754514	45236644848	15.0789	590102724	0.0130448	150	151	34.8	350.9	148	138363766	4394117	241428	10596417
SJR_YC_15-16_Fam5	320820108	160410054	160410054	319482984	0.995832	318641478	0.993209	15.9321	1337124	295312554	14.7656	320820108	65861975	48249188085	48047707478	45876663279	15.2922	601848544	0.0131188	150	151	35.1	339.1	144.5	140435315	4595354	234266	10336271
SJR_YC_15-16_Fam6	329071194	164535597	164535597	327804781	0.996152	327000138	0.993706	16.35	1266413	305603494	15.2802	329071194	68281619	49435022276	49244246171	46934769219	15.6449	614443970	0.0130914	150	151	34.8	328.1	139.5	143730239	4760497	225641	9469465
SJR_YC_15-16_Fam7	320131522	160065761	160065761	318879725	0.99609	318053670	0.993509	15.9027	1251797	296133300	14.8067	320131522	66806240	48109787578	47921169854	45791977733	15.264	594780911	0.0129888	150	151	34.9	330.1	141.6	139811751	4575115	226061	9616281
SJR_YC_15-16_Fam8	300480350	150240175	150240175	299038119	0.9952	298021944	0.991818	14.9011	1442231	276407232	13.8204	300480350	62463177	45205274573	44987898992	42842160960	14.2807	550459318	0.0128485	150	151	34.8	374.9	159	132466819	3917942	227612	9609040
SJR_YC_15-16_Fam9	371263128	185631564	185631564	369732011	0.995876	368718836	0.993147	18.4359	1531117	344002912	17.2001	371263128	78819815	55789594890	55558907522	53015056153	17.6717	672017571	0.012676	150	151	34.9	335.4	139.3	162578920	5082479	257342	10947454
SJR_YC_15-16_Fam10	307505234	153752617	153752617	306094129	0.995411	305131452	0.992281	15.2566	1411105	283733954	14.1867	307505234	63820833	46236591524	46023939815	43876124886	14.6254	559279041	0.0127468	150	151	34.8	350.6	146.9	135024870	4080402	225802	9515508
SJR_YC_15-16_Fam11	298894742	149447371	149447371	297574049	0.995581	296688440	0.992618	14.8344	1320693	276588392	13.8294	298894742	63881159	44885736612	44686750138	42620887685	14.207	546147119	0.0128141	150	151	34.9	334.2	143.4	129891436	4211908	209287	8901939
SJR_YC_15-16_Fam12	345538112	172769056	172769056	343823392	0.995038	342643518	0.991623	17.1322	1714720	318804394	15.9402	345538112	73438073	51955952737	51697508949	49195306782	16.3984	640315475	0.0130158	150	151	34.8	355	152	151600866	4725390	250257	10611924
							Average	18.4989
							Min	13.6778
							Max	28.0223
